# Supplementary material for: An integrated quartz tube atom trap coupled with solid sampling electrothermal vapourization and its application to detect trace lead in food samples by atomic fluorescence spectrometry
Source: Royal Society of Chemistry journal article supplement (doi:10.1039/c6ja00316h), 2016-01-01
Supplement: c6ja00316h1.pdf [file c6ja00316h1.pdf]

**Electronic Supplementary information for**

**An integrated quartz tube atom trap coupled with solid sampling electrothermal vapourization and its application to detect trace lead in food samples by atomic fluorescence spectrometry**

Li Feng,<sup>a,b</sup> Jixin Liu,<sup>\*a,b</sup> Xuefei Mao<sup>\*a</sup>, Dong Lu,<sup>b</sup> Xiaofang Zhu,<sup>b</sup> Yongzhong Qian<sup>a</sup>

*<sup>a</sup>Institute of Quality Standard and Testing Technology for Agro-products, Chinese Academy of Agricultural Sciences, and Key Laboratory of Agro-food Safety and Quality, Ministry of Agriculture, Beijing 100081, China*

*<sup>b</sup>Beijing Titan Instruments Company, Limited, Beijing 100015, China*

Corresponding authors: Tel: +86-10-82106563, Fax: +86-10-82106566.

E-mail address: ljx2117@gmail.com (J. X. Liu), mx08@163.com & maOXuefei@caas.cn (X. F. Mao)

## Experimental

**Instrumentation.** In Fig. S1 (TC-ETV-QTAT-AFS), a  $\Phi 2 \times 10$  mm ten-circle tungsten coil (Xiamen Honglu Tungsten Molybdenum Industry Co. Ltd., Fujian, China) was sealed in a 2 mL quartz bulb as the vapourizer and was linked with a DC power supply (30 V  $\times$  50 A, Kunming Guiyan Jinfeng Technique Co. Ltd., Yunnan, China). The vapourizer was connected to the left inlet of an QTAT ( $\Phi 3/1 \times 180$  mm) with a 15 cm polytetrafluoroethylene (PTFE) tube, in which a 50 mm axially long segment of the QTAT from the leftmost end was coiled with a 1.0-mm heating Ni-Cr wire using an AC power supply (220 V  $\times$  10 A, Kunming Guiyan Jinfeng Technique Co. Ltd., Yunnan, China). The right outlet of the QTAT was coupled with a commercial atomic fluorescence spectrometer (AFS-8220, Beijing Titan Instrumental Co., Ltd, Beijing, China) fitted with a lead high-intensity hollow cathode lamp (HCL, Beijing Research Institute of Nonferrous Metals, Beijing, China).

Supplementary data

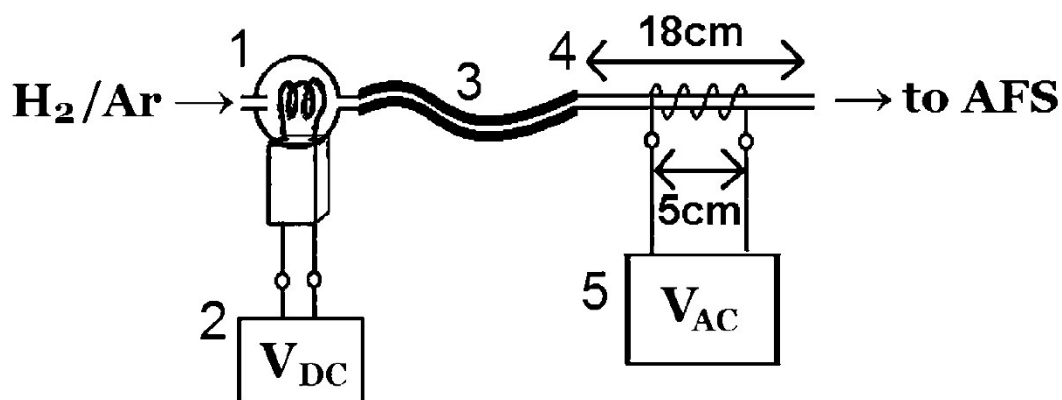

**Figure S1 Schematic diagram for TC-ETV-QTAT-AFS.** 1, TC electrothermal vapourizer; 2, DC power supply for electrically heating the vapourizer (1); 3, connecting tube between the vapourizer (1) and trap (4); 4, 18 cm QTAT coiled with Ni-Cr wire (50 mm axially long from the leftmost end); 5, AC power supply for electrically heating the QTAT (4).

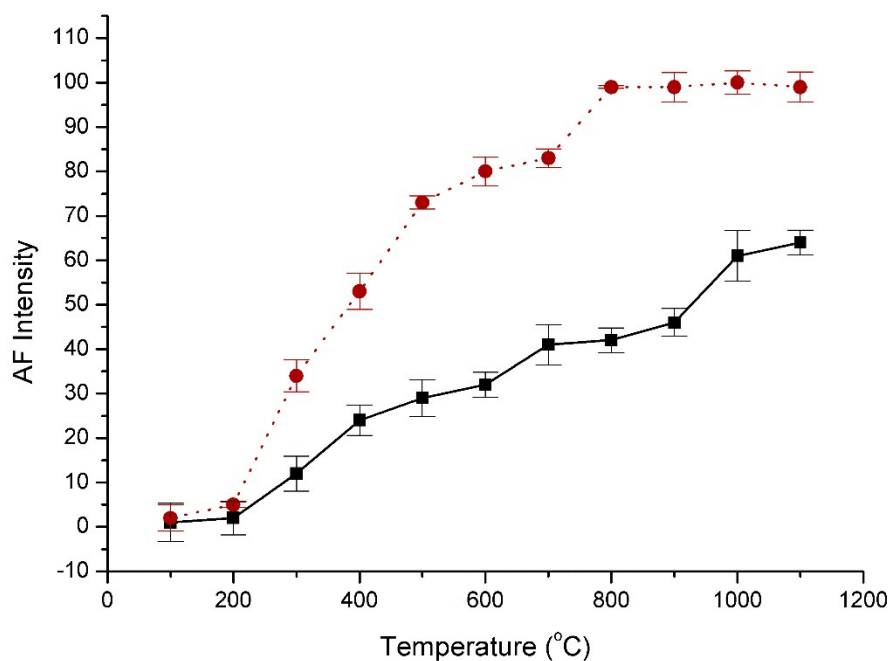

**Figure S2 Vapourization ratio of Pb at different temperatures in Ar (■) and H<sub>2</sub>/Ar (●) carrier gas.** A 1 ng sample of Pb was measured by TC-ETV-QTAT-AFS using a carrier gas of Ar or 10% H<sub>2</sub>/Ar (v/v) at 400 mL min<sup>-1</sup>. The intensity of the AF signal vapourized at 1000 °C was set as 100, and the others were normalized.

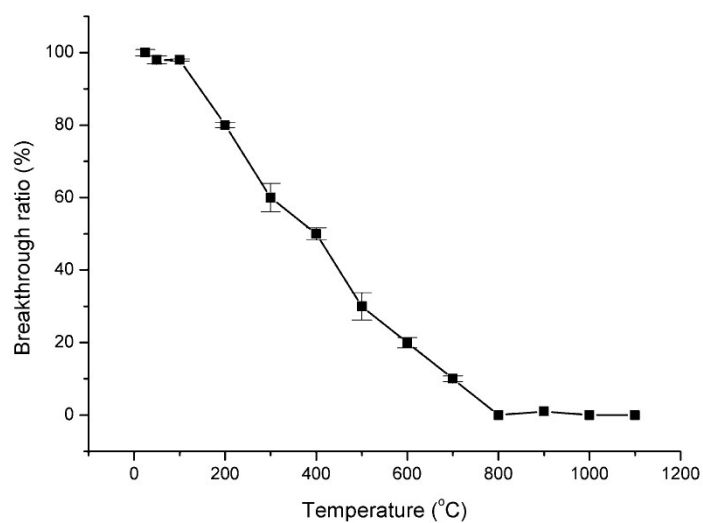

**Figure S3 Pb breakthrough ratio of the TC-ETV-QTAT under different temperatures.** A 1 ng sample of Pb was measured by TC-ETV-QTAT using carrier gas of 10% H<sub>2</sub>/Ar (v/v) at 400 mL min<sup>-1</sup>. The intensity of the AF signal passed through the QTAT at ambient temperature was set as 100, and the others were normalized.

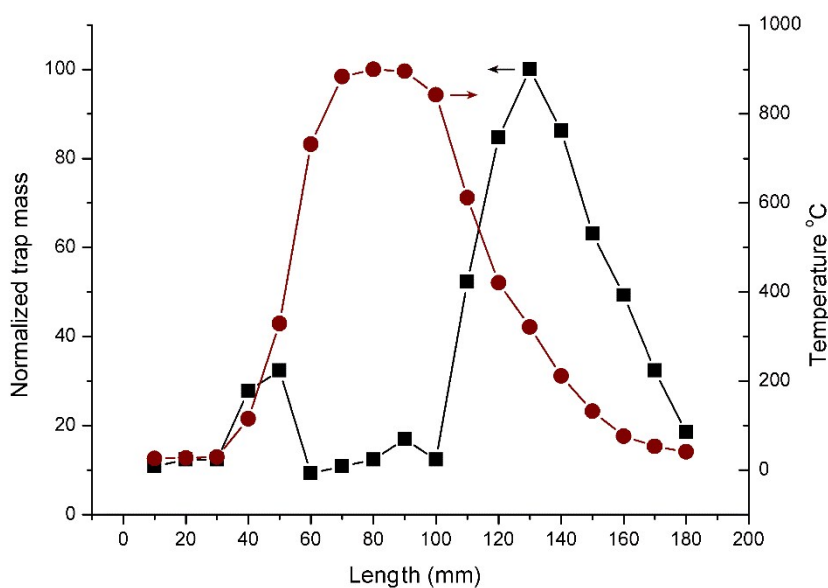

**Figure S4 The length distribution of the trapped Pb (■) and temperature (●) on the QTAT coupled with TC-ETV.** A 1 ng sample of Pb was measured by TC-ETV-QTAT using a carrier gas of 10% H<sub>2</sub>/Ar (v/v) at 400 mL min<sup>-1</sup>. The intensity of the AF signal at 130 mm was set as 100, and the others were normalized.
